# Supplementary material
Source: PubMed Central journal article supplement (PMC5972307)
Supplement: jgv-97-334-s001.pdf [file jgv-97-334-s001.pdf]

## SUPPLEMENTARY FIGURES

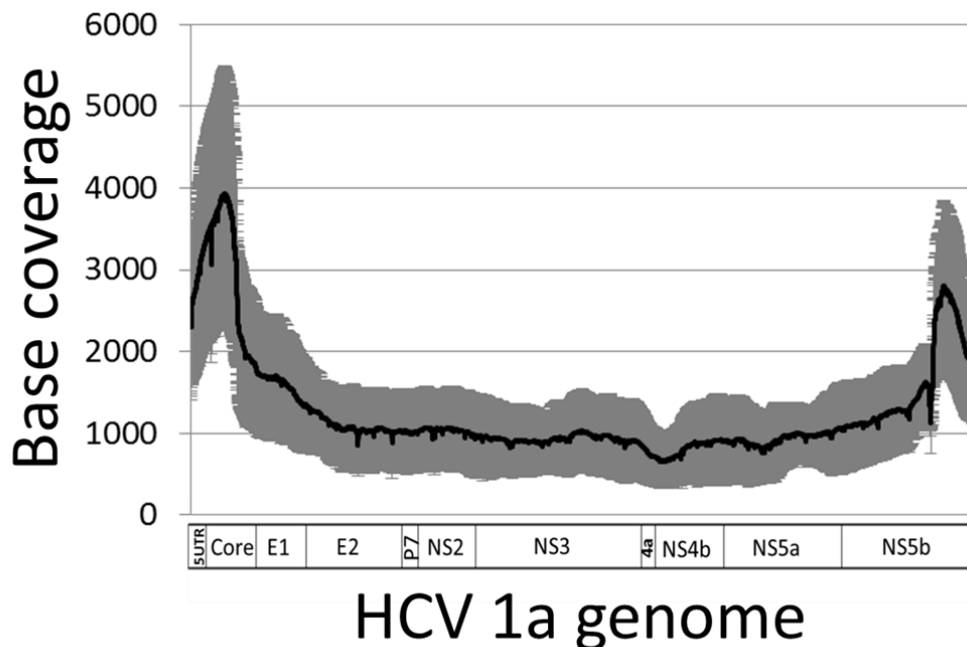

**Fig. S1.** Average base coverage over 9022-bp amplicon after read quality control. The amplicon covers 96% HCV genome from 5'UTR to NS5b as indicated at the bottom. Grey area represented standard deviation at each HCV genomic position.

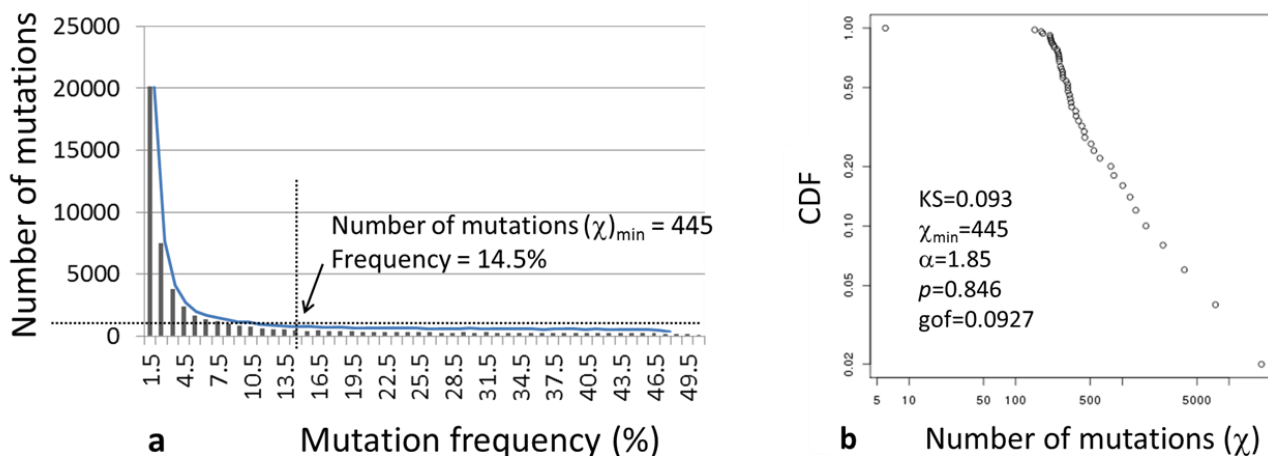

**Fig. S2.** The mutation frequency-based histogram of a total of 64,221 mutations identified in 104 samples (a), which fitted in with a power law distribution (b) with the low-bound point ( $\chi_{\min}$ ) at 445, corresponding with a mutation frequency at 14.5% (a). CDF, cumulative distribution function.

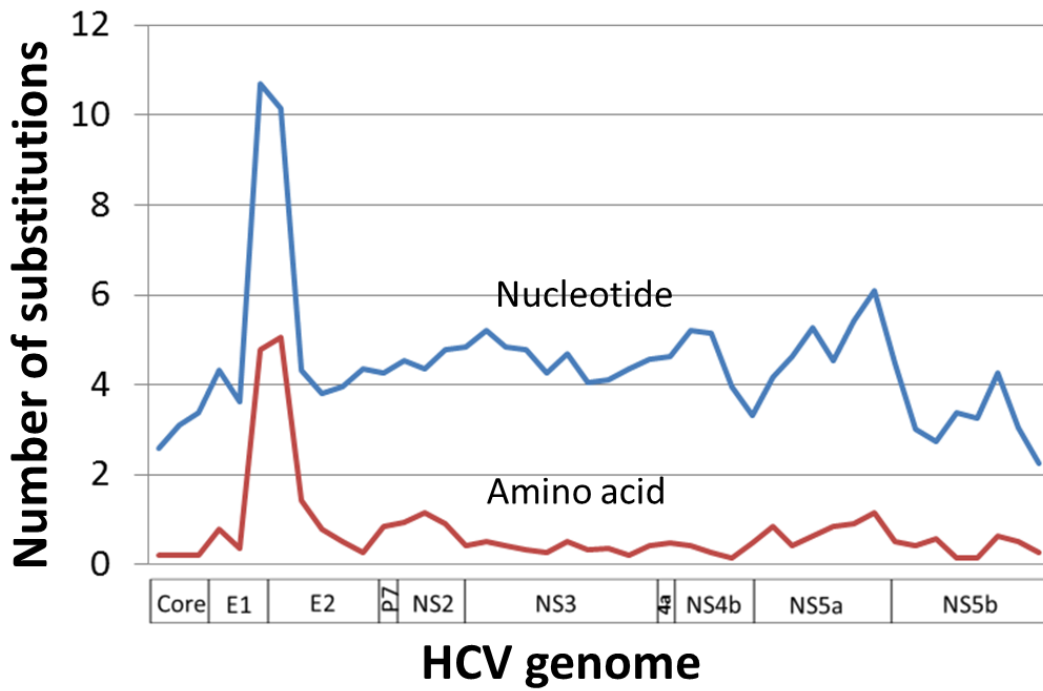

**Fig. S3.** Sliding window analysis (window=300 bp, step=99 bp) of amino acid (red) and nucleotide (blue) substitutions over the HCV genome in patients relapsed from the antiviral therapy. Peaks appeared on both curves correspond to the HCV HVR1 region.
